# Supplementary material
Source: HighWire-hosted journal article supplement (http://thorax.bmj.com/highwire/filestream/174143/field_highwire_adjunct_files/0/Thorax_Table_134643.xlsx)
Supplement: Thorax_Table_134643.xlsx [file Thorax_Table_134643.xlsx]

## Sheet: Suppl table
	Supplementary Table: Adjusted incident rate ratios for the susceptibility of lower respiratory tract isolates of H Influenzae, S aureus and S pneumoniae by patient age group in England, Wales and Northern Ireland (January 2007-March 2010)
			Antibiotic
			Tetracyclines		Co-amoxiclav		Ciprofloxacin		Macrolides†		Ampicillin / Amoxicillin
	Likelihood ratio test p value for interaction between organism and age group		p=0.018		p<0.0001		p<0.0001		p<0.0001		p=0.500
	Number of observations		69443		57895		34799		54303		55176
	Patient Age Group	Organism	IRR	95% Cis	IRR	95% Cis	IRR	95% Cis	IRR	95% Cis	IRR	95% Cis
		H influenzae	0.999427	(1.00, 1.00)	1.01785	(1.01, 1.02)	1.00091	(0.97, 1.04)	1.1003	(1.02, 1.19)	1.04	(1.03, 1.06)
	<45 years	S aureus	0.957526	(0.95, 0.97)	0.971633	(0.94, 1.00)	0.684736	(0.65, 0.72)	4.04612	(3.84, 4.27)	0.313101	(0.28, 0.35)
		S pneumoniae*	0.940422	(0.93, 0.95)	1.03542	(1.03, 1.05)	--	--	5.54775	(5.27, 5.84)	1.32157	(1.30, 1.34)
		H influenzae	1	--	1	--	1	--	1	--	1	--
	45-65 years	S aureus	0.956593	(0.95, 0.97)	0.867387	(0.83, 0.91)	0.676422	(0.64, 0.72)	4.54604	(4.31, 4.80)	0.300141	(0.27, 0.34)
		S pneumoniae*	0.914643	(0.91, 0.92)	1.02282	(1.01, 1.03)	--	--	5.41155	(5.15, 5.69)	1.26687	(1.26, 1.28)
		H influenzae	0.998066	(1.00, 1.00)	0.996739	(0.99, 1.00)	0.999418	(0.97, 1.03)	0.935899	(0.87, 1.01)	1	(0.98, 1.01)
	65-75 years	S aureus	0.963645	(0.95, 0.97)	0.786809	(0.73, 0.84)	0.613062	(0.57, 0.66)	4.50743	(4.27, 4.76)	0.298764	(0.27, 0.33)
		S pneumoniae*	0.912179	(0.90, 0.92)	1.01962	(1.01, 1.03)	--	--	5.36747	(5.10, 5.65)	1.26106	(1.24, 1.28)
		H influenzae	1.00029	(1.00, 1.00)	0.997776	(0.99, 1.01)	1.00206	(0.97, 1.04)	0.884703	(0.81, 0.96)	0.97	(0.96, 0.98)
	75+ years	S aureus	0.958928	(0.94, 0.97)	0.728674	(0.68, 0.79)	0.458328	(0.42, 0.50)	3.94782	(3.73, 4.18)	0.291523	(0.26, 0.33)
		S pneumoniae*	0.918416	(0.91, 0.93)	1.01976	(1.01, 1.03)	--	--	5.31503	(5.05, 5.60)	1.2305	(1.21, 1.25)
			‡ Adjusted for source and sex		‡ Adjusted for sex		‡ Adjusted for source and sex		‡ Adjusted for source		‡ Adjusted for sex
	*Benzyl-penicillin used as a proxy for co-amoxiclav
	†Combined susceptibility results for azithromycin, erythromycin and clarithromycin
	‡ IRRs estimated using Poisson regression models with robust standard error. All models were adjusted for seasonal variation (calendar quarter) and laboratory region as well as sex and isolate source where indicated.
